# Supplementary material
Source: HighWire-hosted journal article supplement (https://www.life-science-alliance.org/content/6/2/e202201712/F6)

**Fig 1F**

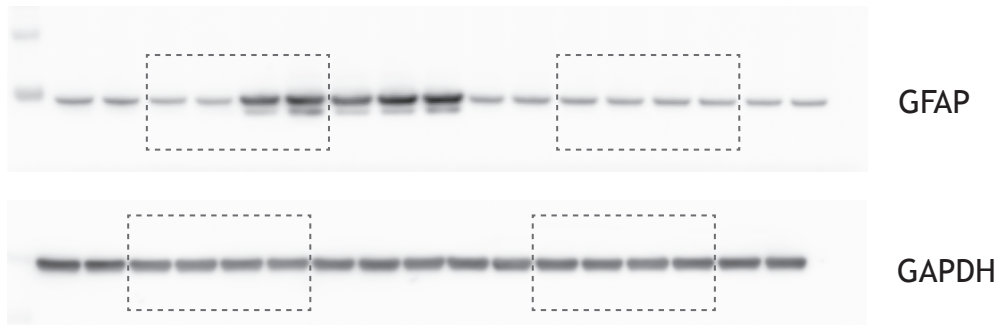

**Fig 2G**

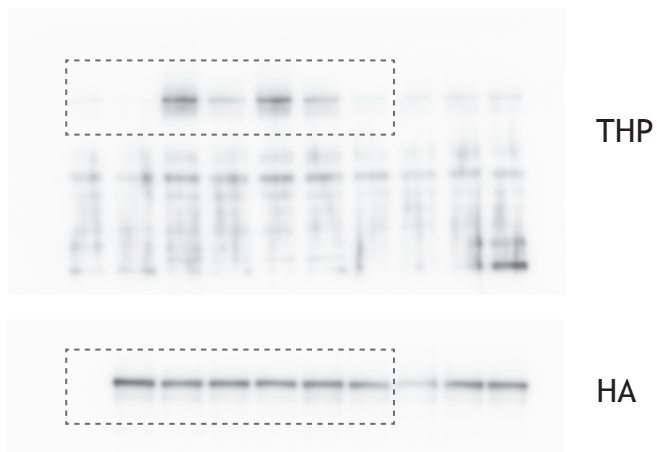

**Fig 3B**

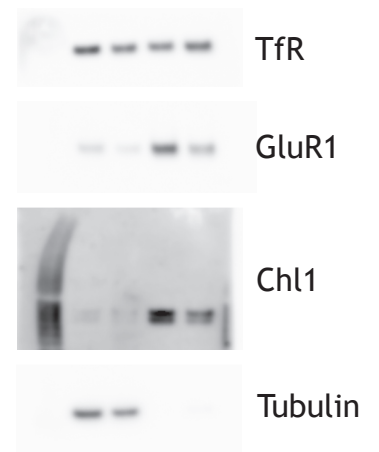

**Fig 3E**

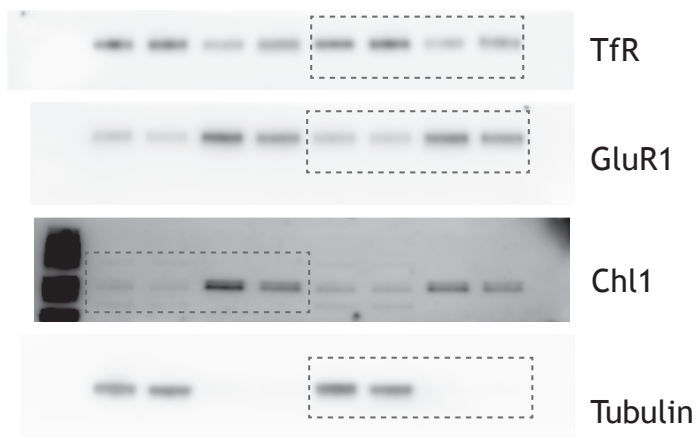

**Fig 4B**

6 weeks

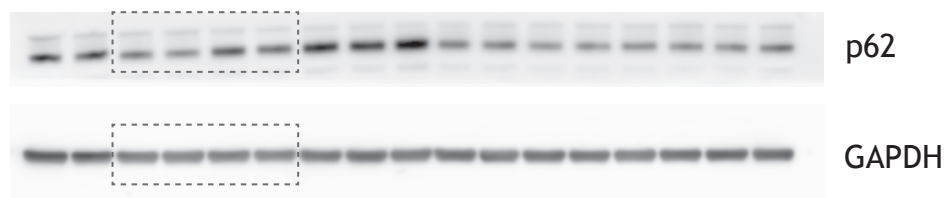

P20

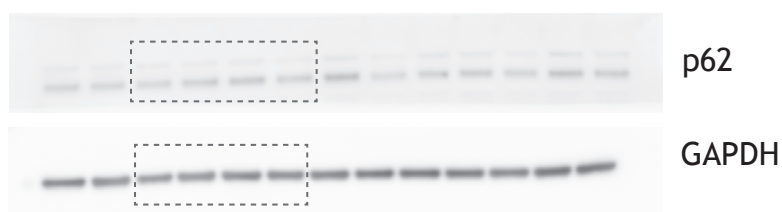

**Fig 4F**

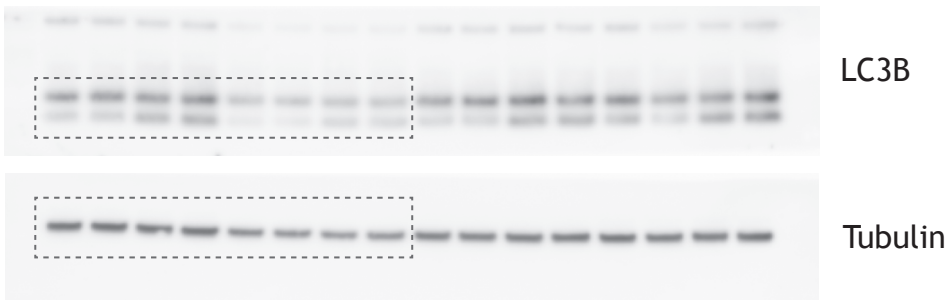

**Fig 4G**

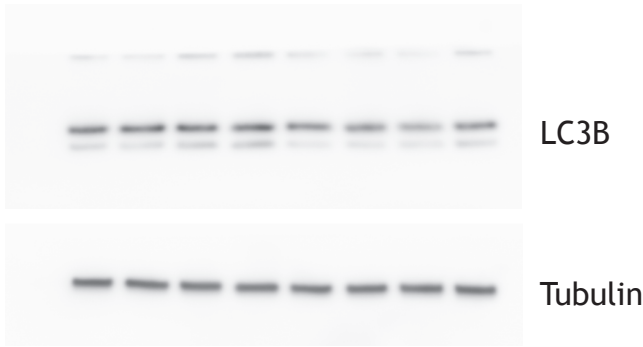

**Fig 5B**

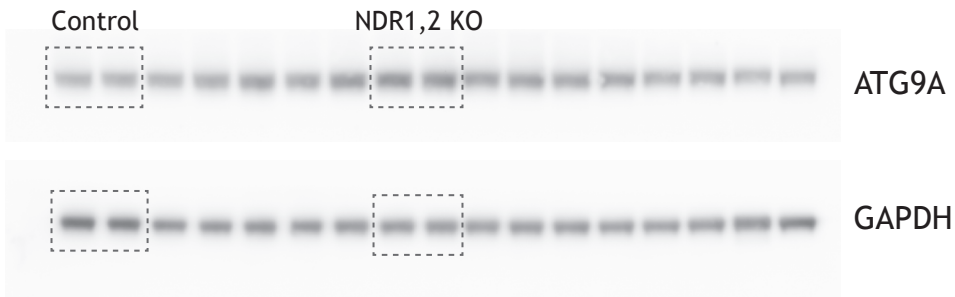

**Fig 5F**

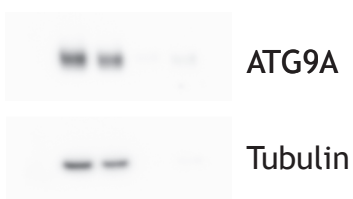

**Fig 5G**

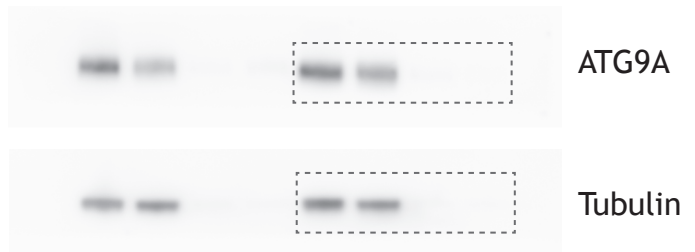

**Fig S1C**

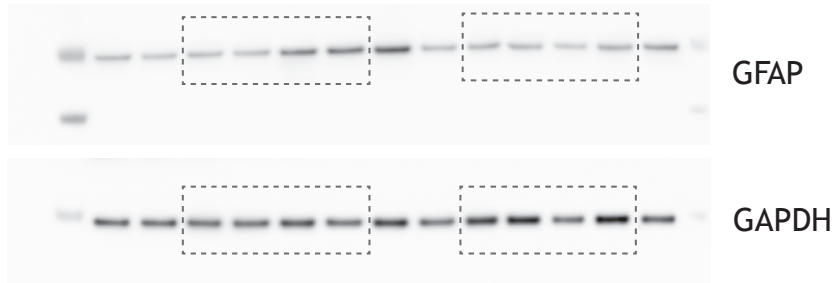

**Fig S1F**

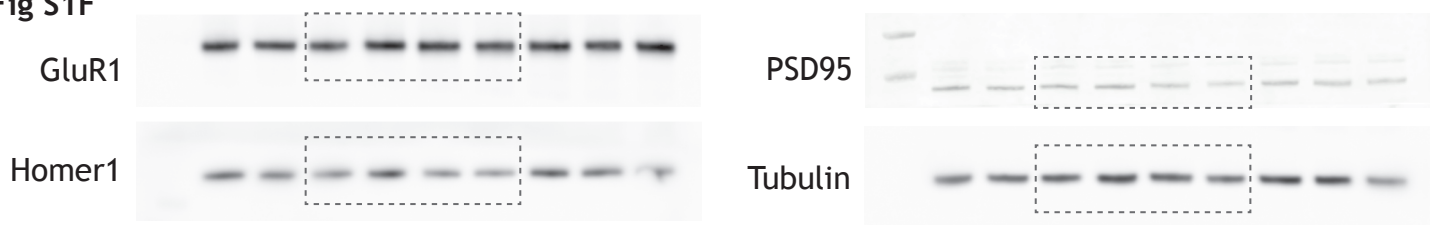

Fig S2F

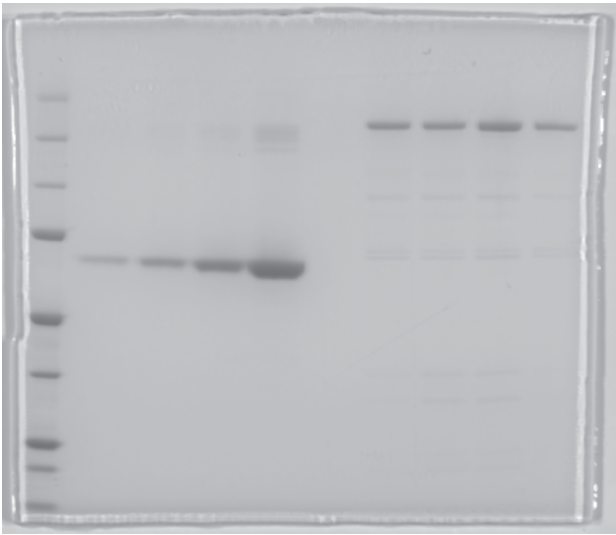

Fig S2G

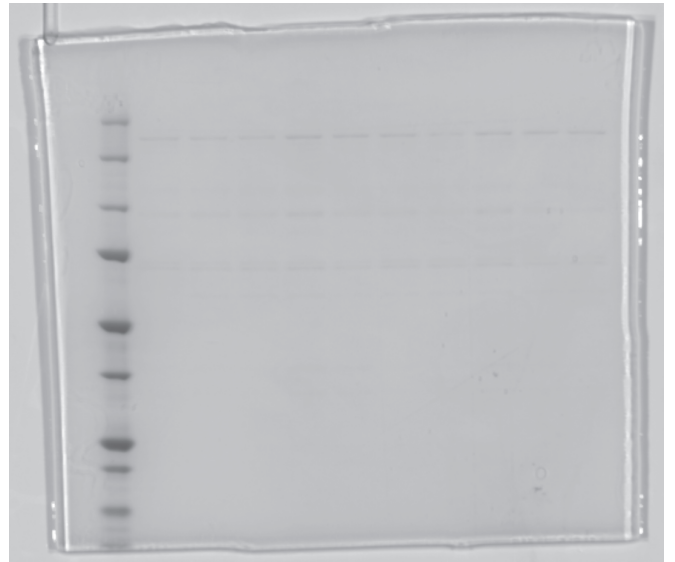

Fig S2H

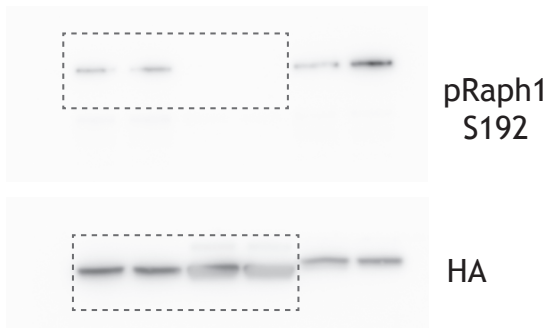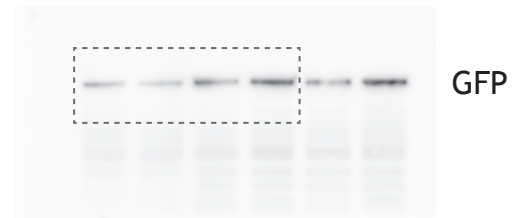

Fig S3A

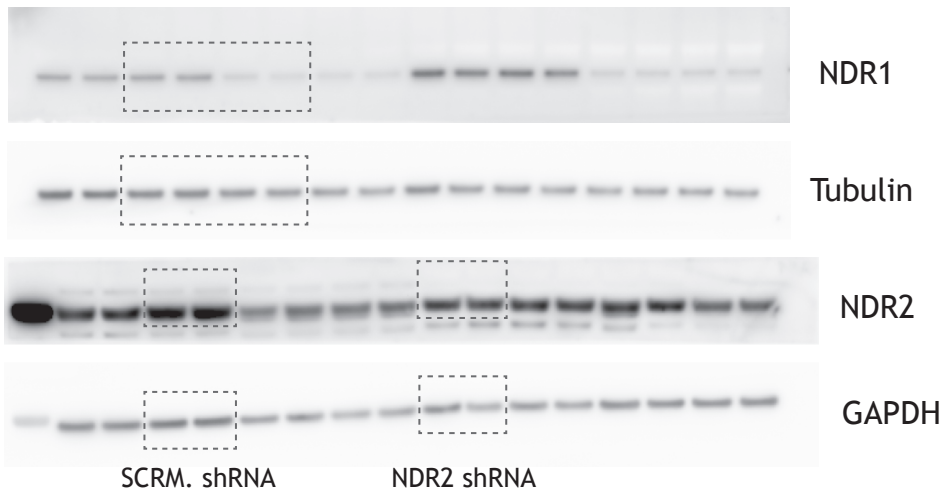

Fig S3B

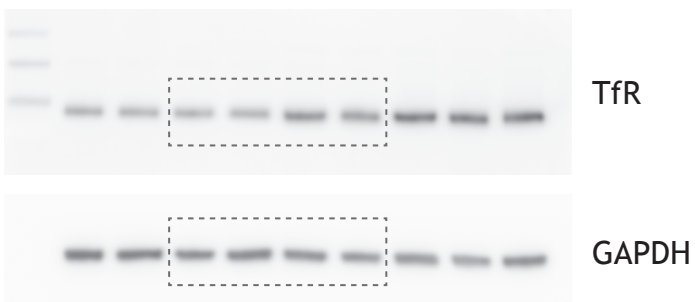

Fig S3D

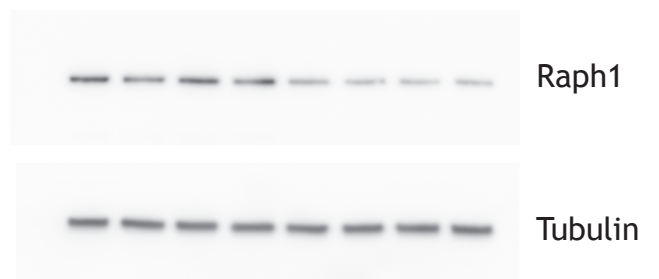

**Fig S4A**

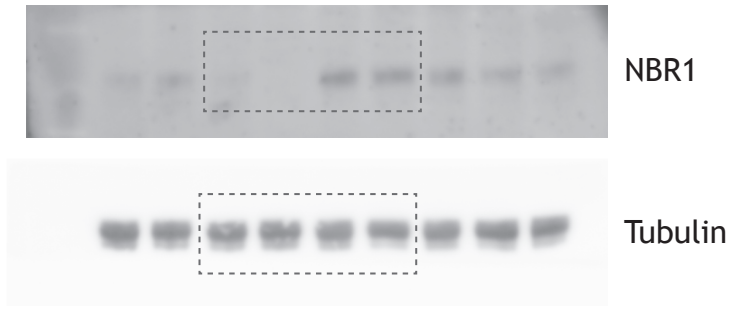

**Fig S4D**

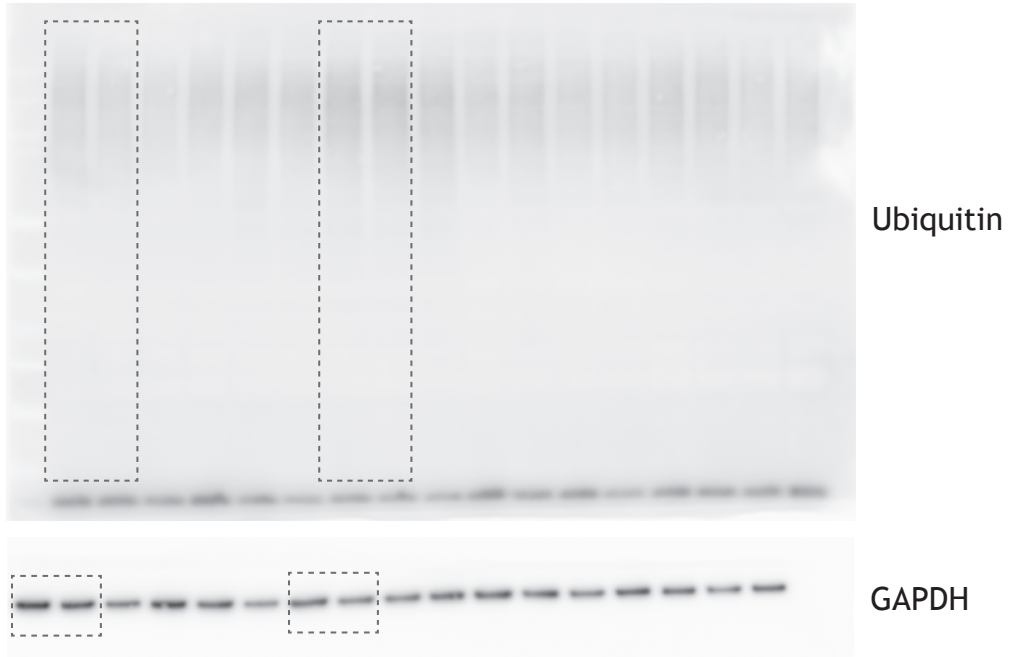

**Fig S4G**

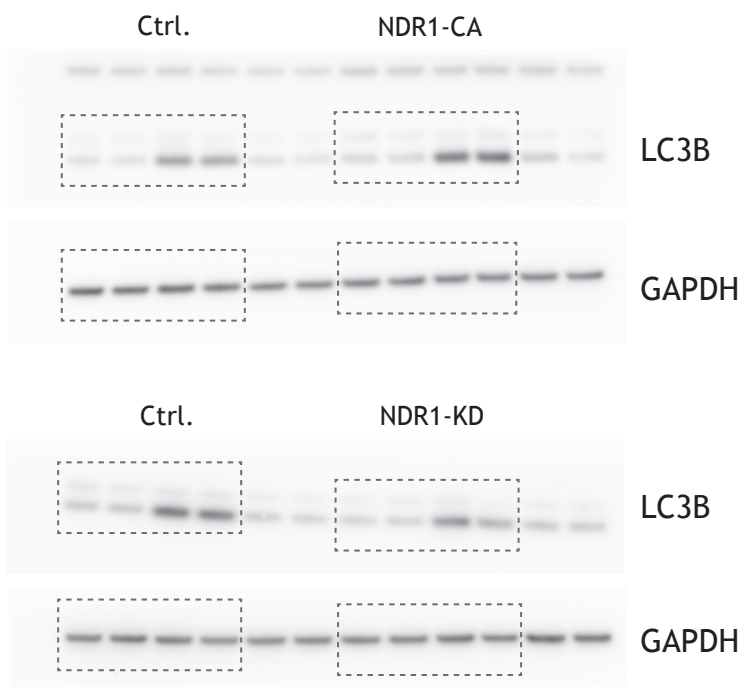

Fig S1B

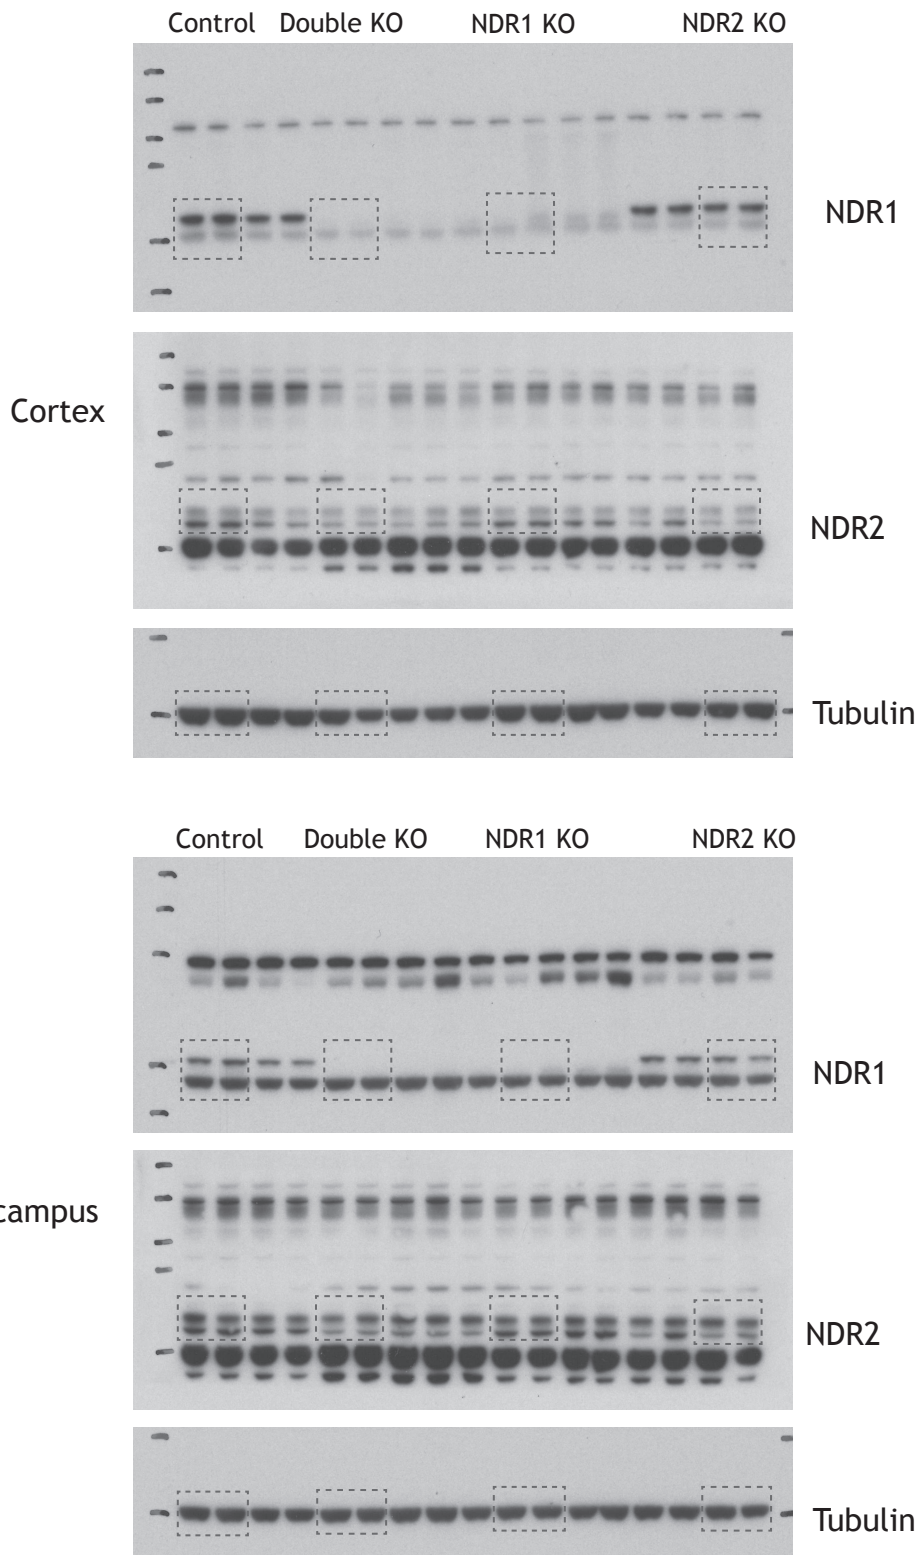

Supplement: inline-supplementary-material-12 [file inline-supplementary-material-12.pdf]
